# Supplementary material for: Sensitivity of cloud phase distribution to cloud microphysics and thermodynamics in simulated deep convective clouds and SEVIRI retrievals
Source: Copernicus journal article supplement (doi:10.5194/egusphere-2023-1193), 2023-06-13
Supplement: Supplementary file [file egusphere-2023-1193-AC1-supplement.pdf]

Response to Referee's Comments:

We would like to thank the Editor and the Referee for the time and efforts handling and reviewing our manuscript. The constructive comments and suggestions were very helpful to improve the manuscript.

The Referee's original comments are formatted in black, while our point-by-point responses are formatted in **blue** font. All the corresponding revisions in the revised manuscript are indicated in **red**.

**Review #1:**

Han et al. examines the role of ice nucleating particles (INPs) and thermodynamic conditions on mixed-phase microphysics, with particular focus on the proportion of liquid to ice in deep convective clouds. They use cloud-resolving simulations to show that increasing the INP concentration leads to glaciation at warmer temperatures and a lower fraction of liquid cloud pixels, and they examine the microphysical mechanisms driving this effect. Furthermore, they apply multiple satellite forward operators to their model output and compare the results to remotely observed cloud properties in order to explore how well these changes driven by INP concentrations might be detected from satellites.

Overall, I think this study tackles valuable questions given the uncertainty surrounding mixed-phase clouds and their interactions with INPs. The use of satellite forward operators to make an apples-to-apples comparisons of remote sensing observations and model data is novel and interesting. That being said, the paper is not always clear about the causes for discrepancies between the models and observations and how these comparisons contribute to the overall goals and science questions. I have some questions/suggestions on these and a few other points that may improve the analysis and focus the discussion. I therefore recommend this article be accepted with major revisions. Please see more detailed comments below.

We would like to thank the reviewer for the help comments and suggestions and for recognizing the contributions made by this work. Our point-by-point responses are found below.

Major Comments:

1. **Role of comparison with satellite data:** The satellite forward operators allow the authors to directly compare model simulated properties to remote sensing retrievals, but it is not clear whether the goal of these comparisons is to evaluate the performance of the model microphysics or of the forward operators/retrieval algorithms.

In some places, it seems that the aim is to evaluate how well the model replicates the remotely sensed cloud phase distributions (i.e., the satellite obs are treated as the “ground truth”). In the conclusions, the authors state that the goal is to “evaluate cloud microphysical processes of numerical models using satellite observations directly”. However, the discussion does not focus on which processes drive the discrepancies between the modelled and actual cloud phase distributions. If this is the overall goal, then there needs to be more analysis of the microphysical differences between simulations which do match the observed data well (e.g., the DEC03/05 simulations) and those which do not, to actually evaluate which processes are not being treated correctly in the models. In other places, it seems that the aim is to evaluate the retrieval algorithms and whether they are able to capture the differences that we expect to see based on the simulations (i.e., the model data fed through the forward operators is the “ground truth”). Most of the discussion fits this framing, which also makes sense given the comparisons of the CLAAS-2 and ML-based retrievals. The discussion about why the CLAAS-2 retrieval performs worse than the ML retrieval should be expanded on beyond saying it was due to the “loss of information through the postprocessing” (e.g., were the pixels with high uncertainty in the ML retrievals on cloud edges?). Also, why does the CLAAS-2

retrieval not capture the differences in cloud phase distribution as a function of INP when it does capture differences as a function of the thermodynamic environment, despite the two perturbations having a similar order of magnitude effect on the modelled phase distribution at cloud top? Either of the two options could make for a valuable contribution to the literature—but the authors should clarify what they are aiming for in comparing the satellite observations to the models.

Thank you very much for your constructive comments. Our aim is “**to evaluate the retrieval algorithms and whether they are able to capture the differences that we expect to see based on the simulations**” but not to evaluate the model microphysics by comparing with satellite observations.

We revised our manuscript according to your comments and suggestions and clarified our research aims. At the end of “Introduction” section we pointed out our research goal, lines 142 to 144 in the clean version of the revised manuscript “...*We aim to evaluate the satellite retrieval algorithms and investigate whether passive satellite cloud products can detect cloud microphysical and thermodynamical perturbations....*”. Moreover, in the “Conclusions” section, we re-emphasized the research goals, lines 609 to 619 in the clean version of the revised manuscript “.....*This enables us to make apples-to-apples comparisons between model simulations and satellite observations. .... Moreover, cloud properties were derived using a satellite forward operator and retrieval algorithms with ICON simulations as input, and compared with CLAAS-2 and SEVIRI\_ML satellite cloud products to evaluate whether satellite retrievals could detect perturbations in cloud microphysics and thermodynamics. Uncertainties in the satellite forward operator were however not assessed in this study, which may influence the validity of corresponding results in some extent.....*”

Regarding why SEVIRI\_ML performs better than CLAAS-2, we have discussed the reason in the last paragraph of section 3.4 “Liquid cloud pixel fraction” from line 557 to 574 in the clean version of the revised manuscript: “.....*As SEVIRI\_ML*

*provides uncertainty estimates, pixels for which either the cloud mask uncertainty or the cloud phase uncertainty is larger than 10% are filtered out. While this ensures that only very certain values are kept, it has a significant impact on the number of remaining values as more than 90% of the pixels are filtered out. The resulting liquid pixel fractions ICON\_RTTOV\_SEVIRI\_ML bear a much stronger similarity to the regrided model output in Figure 8c. ....Generally, the SEVIRI\_ML retrieval algorithm is assumed to perform better than the CLAAS-2 scheme for both cloud top temperature and cloud phase. This is because SEVIRI\_ML employs state-of-the-art neural networks to emulate CALIOP v4 data. Moreover, SEVIRI\_ML provides uncertainty estimates which facilitates filtering out pixels with high uncertainties. Nevertheless, retrieval inaccuracies are unavoidable for passive satellite retrievals which holds true for CLAAS-2 but also for SEVIRI\_ML.....”*

The reviewer also asked why the CLAAS-2 retrieval captures the perturbation in thermodynamics but cannot capture perturbations in INP concentrations at the cloud top. This question also puzzles us. The effect of perturbation in thermodynamics on the cloud phase distribution at the cloud top is as large as the largest INP perturbation (case A $\times 10^3$ ). However, the impact of thermodynamical perturbation is significantly stronger than the INP perturbation within the cloud (Figure 10a VS Figure 8a in the revised manuscript). Moreover, the impacts of thermodynamical perturbation on domain-averaged profiles of cloud hydrometeors and process rates related to ice cloud process are also significantly stronger than the INP perturbation. Thus, the reason is most likely that the thermodynamical perturbation is stronger than the INP perturbation when the entire depth of the cloud is considered.

2. **Model representativeness:** Section 3.1 compares the retrieved cloud properties between the ICON model using a satellite forward operator and actual satellite observations. There is some discussion of the differences between the model and observations which is generally attributed to “model physics”, but it would be useful to see at least a bit more discussion of the factors potentially causing this

(e.g., 1.2km grid spacing isn't resolving entrainment fully). Though I do appreciate that the simulation is not going to perfectly match the observations, the article would be improved if the authors consider how any under-resolved model physics might affect the validity of their findings (or at least argue why they think this isn't the case). For example, a good amount of the discussion focuses on differences in ice microphysics between cloud top and in-cloud—if entrainment is under-resolved, is it possible that the simulated difference between the two regions is magnified compared to reality? The results here may certainly still be applicable especially towards cloud cores that more closely resemble the very homogenous clouds simulated here, but a caveat about realistic cloud edges might improve the discussion.

Thank you very much for your constructive comments and suggestions. We have added more discussions on the potential factors causing the discrepancies between model simulations and satellite observations. More importantly, we have extended the discussion on the potential cloud physical factors, including entrainment mixing process and secondary ice production processes. See the following sentences in the clean version of the revised manuscript from line 343 to 358 “.....*The error sources are manifold and may originate from the model physics as well as from the forward operator and the retrieval algorithm. Geiss et al. (2021) investigated the sensitivity of derived visible and infrared observation equivalents to model physics and operator settings. They found that the uncertainty of the visible forward operator is sufficiently low while infrared channels could bring errors in cloud-top variables. Geiss et al. (2021) concluded that the primary source of deviations is mainly from model physics, especially model assumptions on subgrid-scale clouds. In addition to the subgrid-scale cloud scheme, multiple critical cloud microphysical processes missing from the model, introducing significant uncertainties into the simulation results. For example, the entrainment mixing process is not resolved or parameterized in the model, which has essential influences on processes at cloud boundaries and hence the cloud properties (Mellado, 2017). Moreover, secondary ice processes including droplet shattering and collisional breakup due to ice*

*particles collisions are missing, which have significant impacts on cloud ice microphysics (Sullivan et al., 2018; Sotiropoulou et al., 2021).....”*

3. **Figure 6 and Figure 7 are the same figure.** The authors have probably inserted the wrong figure for one of these unless I’m missing something here.

Thanks for noting this. We inserted a wrong figure, apologies. The correct figure has been inserted for Figure 7 in the revised manuscript.

### **Minor Comments:**

1. Lines 86-87: Suggest citing some work on the transition to deep convection around mixed phase regions (e.g., Li et al., 2013, Sheffield et al., 2015, Mecikalski et al., 2016).

References have been added.

2. Lines 112-123: A lot of this paragraph focuses on INP impacts on precipitation, but this doesn’t seem to be a focus of the rest of the article, so this can be abbreviated to a short statement that the impact of INPs on precipitation from deep convective clouds is still uncertain and may depend on precipitation/cloud type.

The sentences have been revised to “*Both observations and simulations reveal that INPs impact deep convective cloud properties including the persistence of deep convective clouds and precipitation (Twohy, 2015; Fan et al., 2016). However, the impact of INPs on precipitation from deep convective clouds is still uncertain and may depend on precipitation and cloud types (van den Heever et al., 2006; Min et al., 2009; Fan et al., 2010; Li and Min, 2010).*”

3. Lines 141-146: These sentences/references would fit better in the methods.

The sentences have been moved to the “Satellite observations and retrieval algorithms” section, from line 286 to 288 in the clean version of the revised manuscript.

4. Lines 183-193: Are the fitting constants described uniform in space and time, or does the INP concentration only depend on the ambient temperature?

The fitting parameters in Equation (1) vary seasonally but do not vary in space. Thus, the INP concentration not only depends on the ambient temperature but also has seasonal variations.

5. Lines 204-205: How frequently is the model output/sampled for the analyses?

The output interval is 15 minutes. The sentence “.....*Simulation results were saved every 15 minutes.....*” has been added in the revised manuscript.

6. Lines 222-225: The description of the temperature perturbations was confusing. Suggest rephrasing to “The temperature increment is linearly increased/decreased with height from 0K at 3km to +/-3 or +/-5K at 12km, [...]”.

The sentence has been revised to “.....*The temperature increment is linearly increased/decreased with height from 0 K at 3 km to +/-3K and +/-5K at 12 km, creating 4 sensitivity experiments DEC03, DEC05, INC03, and INC05.....*” in the revised manuscript.

7. Lines 347-351: Is there a portion of the domain near the lateral boundaries that is excluded from the analysis?

Yes, there are 4 cell rows for boundary conditions and a nudge zone, in a total of about 30 pixels at the edge of the inner domain, which has been excluded from the analysis.

8. Section 3.2: Does changing the time period considered impact the results (here and in the rest of the sections) at all? Are the trends as a function of INP concentration relatively consistent in time?

Changing the average time period has some impacts on the results, as the developing stage of convective clouds is changed. The trends and statistics analyzed

in this study are still as a function of INP concentration. As the overall results and conclusions do not change, we stick to the chosen time period.

9. Fig 4, 5, 8: The color scheme used makes it difficult to see trends as a function of INP. Maybe use a color scheme with warmer colors for increased INP and cooler colors for decreased INP (or something similar).

Warmer colors were used for increased INP and cooler colors were used for decreased INP cases in Figs 4, 5, and 8 in the revised manuscript.

10. Fig 4-11: Figures would all be improved by indicating important altitudes/levels with a dashed line or similar, or adding a shaded region to indicate the mixed phase region.

Shaded areas indicating the spatial- and time-averaged mixed phase region have been added in Figs 4, 5, and 11 in the revised manuscript. Figures 6, 7, 8, and 10 present quantities as a function of temperature and the mixed-phase region is directly seen, thus no shaded areas or dashed lines are added in those figures.

11. Fig 5: It would be helpful to add a panel to show what percentage of the overall ice formation is heterogeneous vs. homogeneous.

Ice formation is dominated by the homogeneous freezing in this simulation study. Fig 5a and 5b in the revised manuscript show process rates for heterogeneous freezing and homogeneous freezing, respectively. It is clearly seen that process rates of homogeneous freezing (Fig 5b in the revised manuscript) are larger than the process rates of heterogeneous freezing (Fig 5a in the revised manuscript) by one to two orders of magnitude. Moreover, there are already multiple subplots in Fig 5. Thus, we decided not to add an additional panel in Fig 5 in the revised manuscript to show what percentage of the overall ice formation is due to heterogeneous freezing or homogeneous freezing.

12. Fig 6-7: This figure format could use a dashed line at 0.5 liquid fraction since the



glaciation temperature is referenced multiple times in the discussion. Also, it is hard to see the differences in the panels e-h, a difference plot relative to the control instead (or in addition) would be clearer.

Dashed lines at 0.5 liquid fraction which indicate the glaciation temperature have been added in Figs 6 and 7 in the revised manuscript. As for your second suggestion, it is impossible to make it. When calculating the liquid fraction for each case, the data points were selected randomly and the number of the points is different for each case. In the same temperature bin for different cases, the counts of the data points are different from each other. Thus, it is impossible to simply calculate the differences to the CTRL case. The 2-D histograms shown in panels e-h stand for the density of the data points. When one analyzes them together with the liquid mass fraction distributions (panels a-d), the differences between the four cases are clearly seen. Thus, we think the figures are clear enough as they are and difference plots wouldn't tell more.

13. Section 3.3: Are the trends in liquid mass fraction presented here monotonic/is there a consistent trend among all the INP concentrations tested? The authors don't need to show these in the article itself but would be good to make a statement about that and include those figures as a supplement or as a reply to this comment.

The liquid mass fractions as a function of temperature within the cloud and at the cloud top are shown in Figure 1. The temperature was binned by 1 °C, and the mean value of liquid mass fraction was calculated in each temperature bin. Liquid mass fraction decreases monotonically with increasing INP concentration in the temperature range from about -15 to -35 °C both within the cloud and at the cloud top (except for the lowest INP concentrations), and the decreasing trend is more significant at the cloud top compared to within the cloud.

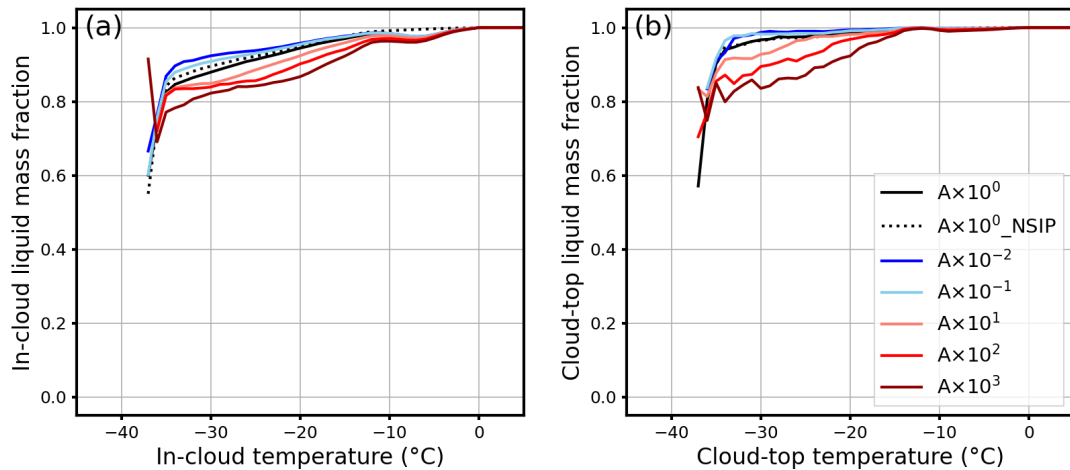

Figure 1: Liquid mass fraction as a function of temperature from 9:00 to 19:00 UTC for the INP sensitivity experiments, (a) in-cloud liquid mass fraction, (b) cloud-top liquid mass fraction. The temperature is binned by 1 °C.

14. Section 3.4: “Liquid cloud pixel number fraction” is a confusing term. Especially since Section 3.3 is about the “cloud liquid mass fraction”, I initially thought “number fraction” was referring to the number of liquid drops versus ice crystals, rather than the number of pixels which are mostly liquid. Maybe the term could be changed to something like “liquid cloud pixel fraction”?

“Liquid cloud pixel number fraction” has been changed to “liquid cloud pixel fraction”.

15. Lines 605-606: The authors say that the magnified impact of INPs at cloud top compared to in-cloud has “implications for analyzing cloud products [...]”. What are the implications?

The sentence is confusing and has been deleted in the revised manuscript.

16. Lines 614-615: Found this sentence confusing: “Total cloud ice mass concentrations do not increase but decrease with increasing concentrations in the simulated deep convective clouds.” Does this just mean that the total cloud ice mass decreases with increasing INP concentrations?

As indicated in Figure 4a, the spatial- and time-averaged profiles of mass concentration of cloud ice crystals decrease with increasing INP concentrations.

The sentence has been revised to “*Ice crystal mass concentration does not increase but decreases with increasing INP concentrations in the simulated deep convective clouds.*” to make it clearer.

17. Lines 627-632: Add a sentence here about the relative impacts of INP and thermodynamic perturbations on the cloud phase distribution.

The sentence “.....*Moreover, cloud thermodynamics can perturb the cloud phase distribution even stronger than microphysics.....*” has been added in lines 654 to 655 in the clean version of the revised manuscript.
